# Supplementary material for: The Relative Impact of Human Disturbances on the Vegetation of a Large Wetland Complex
Source: Springer Nature journal article supplement (doi:10.1007/s13157-010-0019-9), 2010-03-02
Supplement: 13157_2010_19_MOESM1_ESM.pdf [file 13157_2010_19_MOESM1_ESM.pdf]

**Appendix 1** Spearman correlation between abiotic and anthropogenic variables used in the redundancy analyses for the Lanoraie Wetland Complex, and for the ombrotrophic and the minerotrophic plots alone. See Table 2 for variable abbreviations.

|                                 | pH                 | Conductivity | Basal area | Windfall   | Peat       | Mean w.t.l. | W.t.l. fluctuation | % disturbed area | Dedge      | Dditch     |
|---------------------------------|--------------------|--------------|------------|------------|------------|-------------|--------------------|------------------|------------|------------|
| <b>Lanoraie Wetland Complex</b> | Conductivity       | 0.808 ***    |            |            |            |             |                    |                  |            |            |
|                                 | Basal area         | 0.226 **     | 0.141 *    |            |            |             |                    |                  |            |            |
|                                 | Windfall           | 0.177 **     | 0.076      | 0.364 ***  |            |             |                    |                  |            |            |
|                                 | Peat               | -0.085       | -0.163 **  | 0.131 *    | 0.083      |             |                    |                  |            |            |
|                                 | Mean w.t.l.        | 0.407 ***    | 0.251 ***  | -0.018     | 0.032      | 0.039       |                    |                  |            |            |
|                                 | W.t.l. fluctuation | -0.058       | -0.075     | -0.134 *   | -0.021     | -0.269 ***  | -0.258 ***         |                  |            |            |
|                                 | % disturbed area   | 0.111        | 0.127 *    | -0.112     | 0.009      | -0.019      | -0.112             | -0.054           |            |            |
|                                 | Dedge              | -0.252 ***   | -0.323 *** | 0.000      | 0.030      | 0.068       | -0.010             | 0.082            | -0.638 *** |            |
|                                 | Dditch             | 0.093        | -0.077     | -0.128 *   | -0.133 *   | -0.073      | 0.539 ***          | -0.026           | -0.267 *** | 0.242 ***  |
|                                 | Logging            | 0.285 ***    | 0.294 ***  | -0.013     | -0.143 *   | -0.075      | 0.142 *            | -0.177 **        | 0.386 ***  | -0.572 *** |
| <b>Ombrotrophic plots</b>       | Conductivity       | 0.567 ***    |            |            |            |             |                    |                  |            |            |
|                                 | Basal area         | 0.402 **     | 0.451 ***  |            |            |             |                    |                  |            |            |
|                                 | Windfall           | 0.090        | 0.121      | 0.310 **   |            |             |                    |                  |            |            |
|                                 | Peat               | 0.184        | 0.194      | 0.400 **   | 0.178      |             |                    |                  |            |            |
|                                 | Mean w.t.l.        | 0.057        | 0.121      | 0.319 **   | -0.060     | 0.225 *     |                    |                  |            |            |
|                                 | W.t.l. fluctuation | -0.278 *     | -0.303 **  | -0.553 *** | -0.229 *   | -0.575 ***  | -0.624 ***         |                  |            |            |
|                                 | % disturbed area   | 0.358 **     | 0.059      | 0.145      | 0.242 *    | 0.020       | -0.166             | -0.101           |            |            |
|                                 | Dedge              | -0.539 ***   | -0.513 *** | -0.635 *** | -0.375 **  | -0.144      | -0.178             | 0.341 **         | -0.529 *** |            |
|                                 | Dditch             | -0.282 *     | -0.252 *   | -0.459 *** | -0.318 **  | -0.134      | 0.456 ***          | -0.026           | -0.371 **  | 0.502 ***  |
|                                 | Logging            | 0.307 **     | 0.174      | 0.192      | 0.133      | 0.049       | 0.018              | 0.016            | 0.326 **   | -0.435 *** |
| <b>Minerotrophic plots</b>      | Conductivity       | 0.555 ***    |            |            |            |             |                    |                  |            |            |
|                                 | Basal area         | -0.025       | -0.188 *   |            |            |             |                    |                  |            |            |
|                                 | Windfall           | -0.075       | -0.243 **  | 0.317 ***  |            |             |                    |                  |            |            |
|                                 | Peat               | 0.073        | -0.125     | 0.122      | 0.124      |             |                    |                  |            |            |
|                                 | Mean w.t.l.        | 0.237 **     | -0.009     | -0.256 **  | -0.102     | 0.086       |                    |                  |            |            |
|                                 | W.t.l. fluctuation | 0.052        | 0.015      | 0.017      | 0.052      | -0.207 **   | -0.145             |                  |            |            |
|                                 | % disturbed area   | -0.031       | 0.064      | -0.264 **  | -0.100     | 0.001       | -0.147             | -0.034           |            |            |
|                                 | Dedge              | 0.039        | -0.129     | 0.334 ***  | 0.280 **   | 0.050       | 0.139              | -0.001           | -0.684 *** |            |
|                                 | Dditch             | 0.272 **     | -0.039     | -0.015     | -0.079     | -0.077      | 0.558 ***          | 0.016            | -0.231 **  | 0.149      |
|                                 | Logging            | 0.001        | 0.074      | -0.213 **  | -0.335 *** | -0.025      | 0.041              | -0.217 **        | 0.394 ***  | -0.567 *** |

\* $p \leq 0.05$ , \*\* $p \leq 0.01$ , \*\*\* $p \leq 0.0001$
