# Supplementary material for: The Relative Impact of Human Disturbances on the Vegetation of a Large Wetland Complex
Source: Springer Nature journal article supplement (doi:10.1007/s13157-010-0019-9), 2010-03-02
Supplement: 13157_2010_19_MOESM2_ESM.pdf [file 13157_2010_19_MOESM2_ESM.pdf]

**Appendix 2** List of species found in the Lanoraie Wetland Complex, southern Québec. Species that in Québec occur always, preferably or frequently in bogs or fens are classified as peatland species (P) while species not normally observed in peatlands were classified as non-peatland species (N). Species for which information about their habitat preference was lacking or very generalist species were not classified according to those two classes. Bold designates exotic species in Québec (C. Lavoie, unpublished data).

| Species                                             | Habitat | Species                                             | Habitat | Species                                       | Habitat |
|-----------------------------------------------------|---------|-----------------------------------------------------|---------|-----------------------------------------------|---------|
| <b>Trees</b>                                        |         |                                                     |         |                                               |         |
| <i>Abies balsamea</i>                               | N       | <i>Fraxinus nigra</i>                               | P       | <i>Populus tremuloides</i>                    | N       |
| <i>Acer rubrum</i>                                  | P       | <i>Larix laricina</i>                               | P       | <i>Prunus pensylvanica</i>                    | N       |
| <i>Acer saccharum</i>                               | N       | <i>Picea glauca</i>                                 | N       | <i>Prunus serotina</i>                        | N       |
| <i>Betula alleghaniensis</i>                        | N       | <i>Picea mariana</i>                                | P       | <i>Thuja occidentalis</i>                     | P       |
| <i>Betula papyrifera</i>                            | N       | <i>Pinus strobus</i>                                | N       | <i>Tilia americana</i>                        | N       |
| <i>Betula populifolia</i>                           | P       | <i>Populus balsamifera</i>                          | N       | <i>Tsuga canadensis</i>                       | N       |
| <i>Betula x raymundii</i>                           | P       | <i>Populus deltoides</i>                            | N       | <i>Ulmus americana</i>                        | N       |
| <i>Fraxinus americana</i>                           | N       | <i>Populus grandidentata</i>                        | N       |                                               |         |
| <b>Shrubs</b>                                       |         |                                                     |         |                                               |         |
| <i>Acer spicatum</i>                                | N       | <i>Lonicera villosa</i>                             | P       | <i>Salix eriocephala</i>                      | N       |
| <i>Alnus incana</i> ssp. <i>rugosa</i>              | P       | <b><i>Malus pumila</i></b>                          | N       | <i>Salix humilis</i>                          | N       |
| <i>Andromeda polifolia</i> var. <i>glaucophylla</i> | P       | <i>Photinia melanocarpa</i>                         | P       | <i>Salix lucida</i>                           | N       |
| <i>Betula pumila</i>                                | P       | <i>Prunus virginiana</i>                            | N       | <i>Salix pedicellaris</i>                     | P       |
| <i>Chamaedaphne calyculata</i>                      | P       | <i>Rhamnus alnifolia</i>                            | P       | <i>Salix petiolaris</i>                       | N       |
| <i>Corylus cornuta</i>                              | N       | <i>Rhododendron canadense</i>                       | P       | <i>Salix pyrifolia</i>                        | P       |
| <i>Cornus sericea</i> ssp. <i>sericea</i>           | N       | <i>Ribes cynosbati</i>                              | N       | <i>Sambucus nigra</i> ssp. <i>canadensis</i>  |         |
| <i>Gaylussacia baccata</i>                          | P       | <i>Ribes glandulosum</i>                            | N       | <i>Spiraea alba</i> var. <i>latifolia</i>     | P       |
| <i>Gaultheria hispidula</i>                         | P       | <i>Ribes hirtellum</i>                              |         | <i>Spiraea tomentosa</i>                      | P       |
| <i>Gaultheria procumbens</i>                        | N       | <i>Ribes lacustre</i>                               | N       | <i>Taxus canadensis</i>                       | N       |
| <i>Ilex mucronata</i>                               | P       | <i>Ribes triste</i>                                 | N       | <i>Vaccinium angustifolium</i>                | P       |
| <i>Ilex verticillata</i>                            | P       | <i>Rubus allegheniensis</i>                         | N       | <i>Vaccinium corymbosum</i>                   | P       |
| <i>Kalmia angustifolia</i>                          | P       | <i>Rubus idaeus</i>                                 | N       | <i>Vaccinium myrtilloides</i>                 | P       |
| <i>Kalmia polifolia</i>                             | P       | <i>Rubus setosus</i>                                | P       | <i>Viburnum nudum</i> var. <i>cassinoides</i> | P       |
| <i>Ledum groenlandicum</i>                          | P       | <i>Salix bebbiana</i>                               | P       | <i>Viburnum opulus</i> var. <i>americanum</i> | N       |
| <i>Lonicera canadensis</i>                          | N       | <i>Salix discolor</i>                               | P       |                                               |         |
| <b>Grasses and forbs</b>                            |         |                                                     |         |                                               |         |
| <i>Actaea rubra</i>                                 | N       | <i>Dalibarda repens</i>                             | N       | <i>Oxalis montana</i>                         | N       |
| <i>Aralia nudicaulis</i>                            | N       | <i>Doellingeria umbellata</i> var. <i>umbellata</i> | N       | <b><i>Oxalis stricta</i></b>                  | N       |
| <i>Arisaema triphyllum</i>                          | N       | <i>Dryopteris cristata</i>                          | P       | <i>Parthenocissus quinquefolia</i>            | N       |
| <i>Athyrium filix-femina</i>                        | N       | <i>Drosera rotundifolia</i>                         | P       | <i>Phegopteris connectilis</i>                |         |
| <i>Bidens tripartita</i>                            | N       | <i>Dryopteris carthusiana</i>                       | N       | <i>Phryma leptostachya</i>                    | N       |

|                                              |   |                                                   |   |                                                     |   |
|----------------------------------------------|---|---------------------------------------------------|---|-----------------------------------------------------|---|
| <i>Boehmeria cylindrica</i>                  | P | <i>Echinocystis lobata</i>                        | N | <i>Platanthera clavellata</i>                       | P |
| <i>Calamagrostis canadensis</i>              | P | <i>Epilobium leptophyllum</i>                     | P | <i>Platanthera psycodes</i>                         | P |
| <i>Calla palustris</i>                       | P | <b><i>Epipactis helleborine</i></b>               | N | <i>Poa palustris</i>                                | N |
| <i>Caltha palustris</i>                      | P | <i>Equisetum palustre</i>                         | P | <i>Polygonum arifolium</i>                          | N |
| <i>Campanula aparinoides</i>                 | P | <i>Equisetum sylvaticum</i>                       | P | <i>Polygonum cilinode</i>                           | N |
| <i>Carex aquatilis</i>                       |   | <i>Eriophorum vaginatum</i> . var. <i>spissum</i> | P | <i>Polygonum sagittatum</i>                         |   |
| <i>Carex blanda</i>                          |   | <i>Eupatorium maculatum</i>                       | P | <i>Pteridium aquilinum</i>                          | N |
| <i>Carex brunnescens</i>                     | P | <i>Eupatorium perfoliatum</i>                     | N | <i>Rubus hispidus</i>                               | P |
| <i>Carex canescens</i>                       | P | <i>Fragaria virginiana</i>                        | N | <i>Rubus pubescens</i>                              | P |
| <i>Carex chordorrhiza</i>                    | P | <b><i>Galeopsis tetrahit</i></b>                  | N | <i>Rumex orbiculatus</i>                            | P |
| <i>Carex comosa</i>                          | P | <i>Galium asprellum</i>                           | P | <i>Sagittaria latifolia</i>                         | P |
| <i>Carex crinita</i>                         | N | <i>Galium palustre</i>                            | P | <i>Sarracenia purpurea</i>                          | P |
| <i>Carex debilis</i>                         | N | <i>Galium triflorum</i>                           | N | <i>Scirpus cyperinus</i>                            |   |
| <i>Carex disperma</i>                        | P | <i>Glyceria canadensis</i>                        | P | <i>Scutellaria galericulata</i>                     |   |
| <i>Carex echinata</i>                        | P | <i>Glyceria melicaria</i>                         | P | <i>Schoenoplectus tabernaemontani</i>               |   |
| <i>Carex gynandra</i>                        | N | <i>Glyceria striata</i>                           | P | <b><i>Sonchus arvensis</i></b>                      | N |
| <i>Carex interior</i>                        | P | <i>Gymnocarpium dryopteris</i>                    | P | <i>Solidago canadensis</i>                          | N |
| <i>Carex intumescens</i>                     | P | <i>Hydrocotyle americana</i>                      | P | <i>Solidago rugosa</i>                              | N |
| <i>Carex lacustris</i>                       | P | <b><i>Hydrocharis morsus-ranae</i></b>            | N | <i>Sparganium emersum</i>                           | P |
| <i>Carex leptalea</i>                        | P | <i>Impatiens capensis</i>                         |   | <i>Stellaria longifolia</i>                         |   |
| <i>Carex leptoneuria</i>                     | N | <i>Iris versicolor</i>                            | P | <i>Streptopus lanceolatus</i>                       | N |
| <i>Carex oligosperma</i>                     | P | <i>Lemna minor</i>                                | N | <i>Symphyotrichum puniceum</i> var. <i>puniceum</i> | P |
| <i>Carex magellanica</i> ssp. <i>irrigua</i> | P | <i>Leersia oryzoides</i>                          |   | <i>Symplocarpus foetidus</i>                        | N |
| <i>Carex pedunculata</i>                     | P | <i>Linnaea borealis</i>                           | P | <b><i>Taraxacum officinale</i></b>                  | N |
| <i>Carex projecta</i>                        | N | <i>Lycopodium annotinum</i>                       | N | <i>Thalictrum pubescens</i>                         | P |
| <i>Carex radiata</i>                         | N | <i>Lycopodium clavatum</i>                        | N | <i>Thelypteris palustris</i>                        | P |
| <i>Carex scoparia</i>                        |   | <b><i>Lythrum salicaria</i></b>                   | N | <i>Tiarella cordifolia</i>                          | N |
| <i>Carex stipata</i>                         | P | <i>Lysimachia thyrsoiflora</i>                    | P | <i>Toxicodendron radicans</i> ssp. <i>radicans</i>  | N |
| <i>Carex trisperma</i>                       | P | <i>Lycopus uniflorus</i>                          | P | <i>Triadenum virginicum</i>                         | P |
| <i>Chelone glabra</i>                        | P | <i>Maianthemum canadense</i>                      | N | <i>Trientalis borealis</i>                          | P |
| <i>Cicuta bulbifera</i>                      | P | <i>Maianthemum trifolium</i>                      | P | <i>Trillium erectum</i>                             | N |
| <i>Cinna latifolia</i>                       | P | <i>Menyanthes trifoliata</i>                      | P | <i>Typha latifolia</i>                              |   |
| <i>Circaea alpina</i>                        |   | <i>Mitella nuda</i>                               | N | <i>Urtica dioica</i> ssp. <i>gracilis</i>           | N |
| <i>Clematis virginiana</i>                   | N | <i>Mitchella repens</i>                           | N | <i>Vaccinium oxycoccos</i>                          | P |
| <i>Clintonia borealis</i>                    | N | <i>Moneses uniflora</i>                           | N | <b><i>Vicia cracca</i></b>                          | N |
| <i>Comarum palustre</i>                      | P | <i>Nuphar lutea</i> ssp. <i>pumila</i>            | P | <i>Viola blanda</i>                                 | N |
| <b><i>Convolvulus arvensis</i></b>           | N | <i>Oclemena acuminata</i>                         | N | <i>Viola cucullata</i>                              | P |
| <i>Cornus canadensis</i>                     | N | <i>Osmunda cinnamomea</i>                         | P | <i>Viola blanda</i> var. <i>palustriformis</i>      | N |
| <i>Coptis trifolia</i>                       | P | <i>Osmunda claytoniana</i>                        | N | <i>Viola macloskeyi</i> ssp. <i>pallens</i>         | P |
| <i>Cypripedium acaule</i>                    | P | <i>Osmunda regalis</i>                            | P |                                                     |   |

**Sphagnum mosses**

|                               |   |                              |   |                              |   |
|-------------------------------|---|------------------------------|---|------------------------------|---|
| <i>Sphagnum angustifolium</i> | P | <i>Sphagnum fuscum</i>       | P | <i>Sphagnum squarrosum</i>   | P |
| <i>Sphagnum capillifolium</i> | P | <i>Sphagnum girgensohnii</i> | P | <i>Sphagnum teres</i>        | P |
| <i>Sphagnum centrale</i>      | P | <i>Sphagnum magellanicum</i> | P | <i>Sphagnum warnstorffii</i> | P |
| <i>Sphagnum cuspidatum</i>    | P | <i>Sphagnum papillosum</i>   | P | <i>Sphagnum wulfianum</i>    | P |
| <i>Sphagnum fallax</i>        | P | <i>Sphagnum rubellum</i>     | P |                              |   |
| <i>Sphagnum fimbriatum</i>    | P | <i>Sphagnum russowii</i>     | P |                              |   |

**Other mosses**

|                                 |   |                                    |   |                                   |   |
|---------------------------------|---|------------------------------------|---|-----------------------------------|---|
| <i>Atrichum altecristatum</i>   | N | <i>Helodium blandowii</i>          | P | <i>Polytrichum longisetum</i>     | P |
| <i>Aulacomnium palustre</i>     | P | <i>Herzogiella turfacea</i>        |   | <i>Polytrichum strictum</i>       | P |
| <i>Brachythecium spp.</i>       | P | <i>Hylocomium splendens</i>        |   | <i>Pseudobryum cinclidioides</i>  | P |
| <i>Brotherella recurvans</i>    |   | <i>Hylocomiastrum umbratum</i>     |   | <i>Ptilium crista-castrensis</i>  | P |
| <i>Bryhnia novae-angliae</i>    |   | <i>Hypnum lindbergii</i>           | N | <i>Pylaisiella polyantha</i>      |   |
| <i>Callicladium haldanianum</i> |   | <i>Isopterygiopsis muelleriana</i> |   | <i>Rhizomnium appalachianum</i>   | P |
| <i>Calliergon cordifolium</i>   | P | <i>Leucobryum glaucum</i>          | P | <i>Rhizomnium magnifolium</i>     | P |
| <i>Calliergon stramineum</i>    |   | <i>Oncophorus wahlenbergii</i>     | P | <i>Rhizomnium pseudopunctatum</i> | P |
| <i>Campylium chrysophyllum</i>  |   | <i>Plagiomnium cuspidatum</i>      | N | <i>Rhizomnium punctatum</i>       |   |
| <i>Campylium stellatum</i>      | P | <i>Plagiothecium denticulatum</i>  | P | <i>Rhodobryum ontariense</i>      |   |
| <i>Climacium dendroides</i>     | P | <i>Plagiomnium drummondii</i>      |   | <i>Rhytidiadelphus squarrosus</i> |   |
| <i>Dicranum fuscescens</i>      | P | <i>Plagiothecium laetum</i>        | N | <i>Rhytidiadelphus triquetrus</i> | N |
| <i>Dicranum montanum</i>        | N | <i>Plagiomnium medium</i>          | P | <i>Sanionia uncinata</i>          |   |
| <i>Dicranum polysetum</i>       | P | <i>Pleurozium schreberi</i>        | P | <i>Tetraphis pellucida</i>        | P |
| <i>Dicranum scoparium</i>       | N | <i>Pohlia nutans</i>               | P | <i>Thuidium recognitum</i>        | P |
| <i>Dicranum undulatum</i>       | P | <i>Pohlia sphagnicola</i>          | P |                                   |   |
| <i>Eurhynchium pulchellum</i>   | N | <i>Polytrichum commune</i>         | P |                                   |   |

**Hepatics**

|                                  |   |                             |   |                               |   |
|----------------------------------|---|-----------------------------|---|-------------------------------|---|
| <i>Bazzania trilobata</i>        |   | <i>Cephalozia connivens</i> | P | <i>Ptilidium ciliare</i>      | P |
| <i>Calypogeia integristipula</i> | P | <i>Lepidozia reptans</i>    | P | <i>Trichocolea tomentella</i> |   |
| <i>Calypogeia muelleriana</i>    |   | <i>Mylia anomala</i>        | P |                               |   |
| <i>Calypogeia sphagnicola</i>    | P | <i>Pellia epiphylla</i>     | N |                               |   |
